# Supplementary material for: Luteinizing Hormone Receptor Is Expressed in Testicular Germ Cell Tumors: Possible Implications for Tumor Growth and Prognosis
Source: MDPI journal article supplement (doi:10.3390/cancers12061358), 2020-05-26
Supplement: s1 [file s1]

## Western blot - tissues

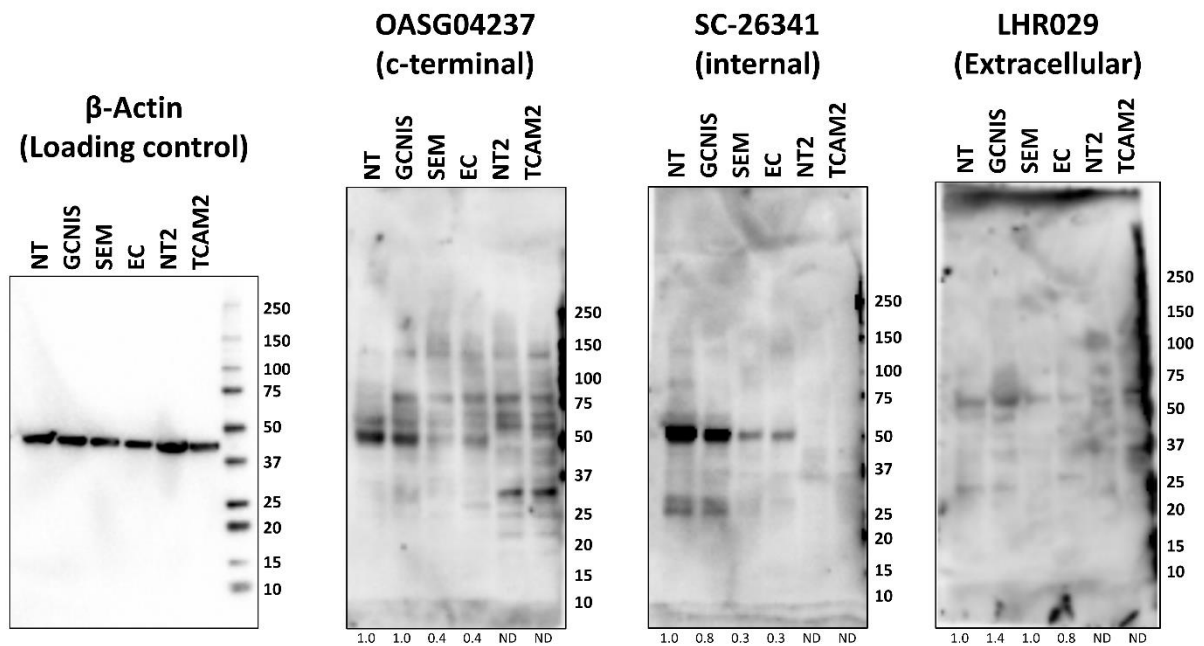

## Western blot - Serum

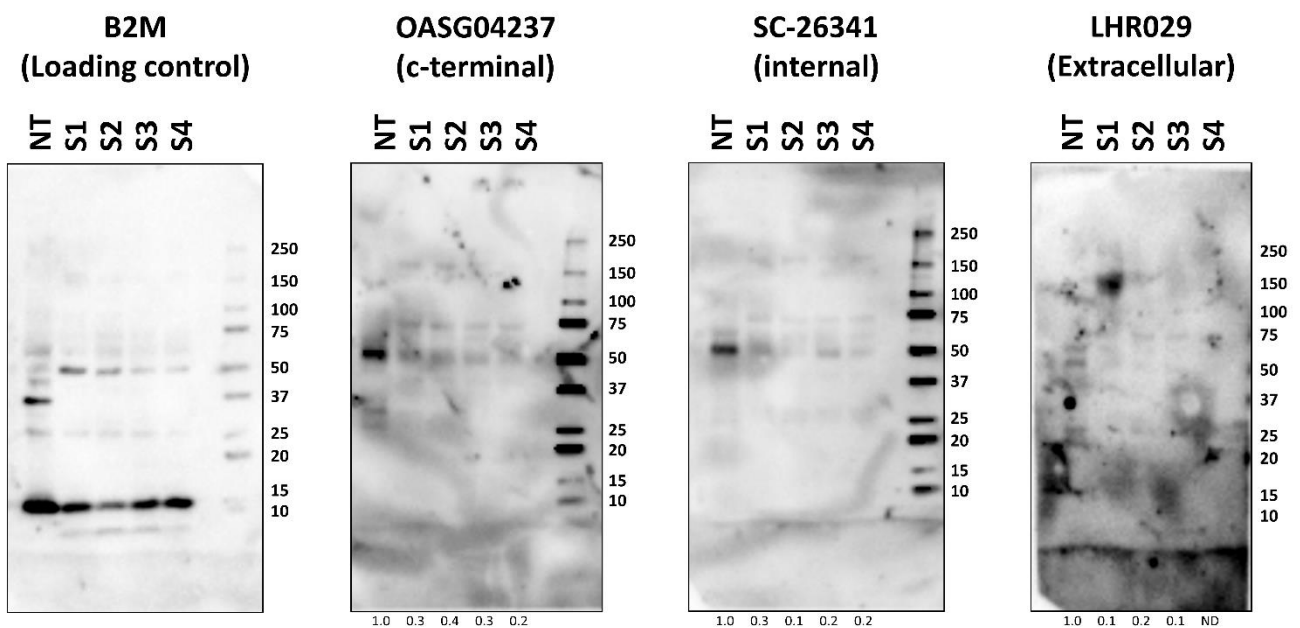

Quantification of the 50 kDa band is indicated below each Western blot figure and was performed relative to β-Actin or B2M and normalized to NT using ImageJ software.
